1 **Running Head:** Drivers of soil nematode diversity

2

3 **Title:** Drivers of nematode diversity in forest soils across climatic zones

4

5 **Authors** Yuanhu Shao<sup>1</sup>, Zuyan Wang<sup>2,3</sup>, Tao Liu<sup>2</sup>, Paul Kardol<sup>4</sup>, Chengen Ma<sup>5</sup>, Yonghong  
6 Hu<sup>6</sup>, Yang Cui<sup>1</sup>, Cancan Zhao<sup>7</sup>, Weixin Zhang<sup>1</sup>, Dali Guo<sup>5†</sup>, Shenglei Fu<sup>1\*</sup>

7

8 **Affiliations**

9 *1. Key Laboratory of Geospatial Technology for the Middle and Lower Yellow River Regions,*  
10 *Ministry of Education, College of Geography and Environmental Science, Henan University,*  
11 *Kaifeng 475004, China.*

12 *2. Key Laboratory of Vegetation Restoration and Management of Degraded Ecosystems,*  
13 *South China Botanical Garden, Chinese Academy of Sciences, Guangzhou 510650, China.*

14 *3. University of Chinese Academy of Sciences, Beijing 100049, China.*

15 *4. Department of Forest Ecology and Management, Swedish University of Agricultural*  
16 *Sciences, 907 51, Umeå, Sweden.*

17 *5. Center of Forest Ecosystem Studies and Qianyanzhou Station, Key Laboratory of*  
18 *Ecosystem Network Observation and Modeling, Institute of Geographic Sciences and Natural*  
19 *Resources Research, Chinese Academy of Sciences, Beijing 100101, China.*

20 *6. Key Laboratory of Digital Earth Science, Aerospace Information Research Institute,*  
21 *Chinese Academy of Sciences, Beijing 100094, China.*

22 *7. International Joint Research Laboratory for Global Change Ecology, School of Life*  
23 *Sciences, Henan University, Kaifeng, Henan 475004, China.*

24

25 \* Corresponding authors: Shenglei Fu (email: fsl@henu.edu.cn; Phone: 86-0371-23881856).

26 † Deceased.

27

## 28 **Abstract**

29 Nematodes are the most abundant multi-cellular animals in soil, influencing key processes and  
30 functions in terrestrial ecosystems. Yet, little is known about the drivers of nematode  
31 abundance and diversity in forest soils across climatic zones. This is despite forests cover  
32 approximately 30% of the earth's land surface, provide many crucial ecosystem services but  
33 strongly vary in hydrothermal conditions and associated ecosystem properties across climatic  
34 zones.

35 Here, we collected nematode samples from 13 forests across a latitudinal gradient. We  
36 divided this gradient in temperate, warm-temperate, and tropical climatic zones. Using boosted  
37 regression trees, we showed that across the gradient, nematode abundance and diversity were  
38 mainly influenced by soil organic carbon. However, within climatic zones, other factors were  
39 more important in driving nematode alpha-diversity, nematode biomass and the abundance of  
40 different trophic groups: mean annual temperature and total soil phosphorus in temperate  
41 zones, soil pH in warm-temperate zones, and mean annual precipitation in tropical zones.  
42 Additionally, nematode beta-diversity was higher in temperate than in warm-temperate and  
43 tropical zones, and we did not find significant differences among climatic zones in nematode  
44 gamma diversity.

45 Together, our findings indicate a latitudinal shift in the main climatic variables controlling  
46 soil nematode communities and demonstrate that the drivers of soil nematode diversity in  
47 forested ecosystems are affected by the spatial scale and climatic conditions considered. This  
48 implies that high resolution studies are needed to accurately predict how soil functions respond  
49 if climate conditions move beyond the coping range of soil organisms. Our results also

50 emphasize the importance of studying the area-diversity relationship of soil organisms under  
51 different climatic conditions.

52

53 *Key words: biogeographical patterns; climate; nematode trophic groups; plant diversity; soil*  
54 *nematodes; soil properties; spatial scale*

55

## 56 **Introduction**

57 Soil biodiversity accounts for a large fraction of the biodiversity on Earth and is key for the  
58 functioning of terrestrial ecosystems (Bardgett and Wardle 2010, Bardgett and van der Putten  
59 2014, Wagg et al. 2014), such as water infiltration, regulation of pests and pathogens, food  
60 security, and the release of nutrients from soil organic matter (Wall et al. 2015). Energy, water,  
61 and latitude determine the alpha-diversity of above-ground organisms (plants and animals) at  
62 a global scale (Hawkins et al. 2003). However, understanding the controlling factors of soil  
63 biodiversity is still a major challenge for ecologists (Decaëns 2010, van den Hoogen et al.  
64 2019). For instance, a recent study found that variation in earthworm diversity was mainly  
65 associated with changes in soil pH and soil carbon at small spatial scales, while precipitation  
66 and temperature were more important at a global scale (Phillips et al. 2019). Furthermore,  
67 plants and soil organisms are tightly linked through multiple direct and indirect pathways  
68 (Wardle et al. 2004). Therefore, the uncertainty of the diversity and community composition of  
69 below-ground organisms is strongly tied to the spatial scale of study due to variation in  
70 climatic, soil, and vegetation properties (Bardgett and van der Putten 2014).

71 Nematodes are the most abundant multi-cellular animals in soil (Bongers and Ferris 1999)  
72 and are a highly diverse group of invertebrates (Hugot et al. 2001). It is estimated that  $4.4 \times$   
73  $10^{20}$  nematodes inhabit surface soils across the world, with higher abundances in sub-Arctic  
74 regions than in temperate or tropical regions, and that the amount of carbon respired by soil

75 nematodes is equivalent to roughly 15% of carbon emissions from fossil fuel use, or around  
76 2.2% of the total carbon emissions from soils (van den Hoogen et al. 2019). A study on the  
77 community structure of soil nematodes that included different ecosystem types did not find a  
78 good predictor of family diversity at the plot level, but nematode family richness was related  
79 to latitude at a global scale (Nielsen et al. 2014). Other studies showed that at regional scales,  
80 soil nematode community composition was mainly influenced by climatic conditions, that is,  
81 precipitation in grassland ecosystems (Chen et al. 2015, 2016; Xiong et al. 2020) and  
82 temperature in coastal ecosystems (Wu et al. 2016). Further, a recent study from forest  
83 ecosystems suggested that climate factors were the drivers of nematode community  
84 composition at the regional scale, while terrain and soil characteristics were the drivers of  
85 nematode community composition at local scales (Xiao et al. 2021). However, the study by  
86 Xiao et al. (2021) was based on a limited number of observations (i.e., sampling at three points  
87 only). So far, few studies have focused on soil nematode communities in forested ecosystems  
88 along a hydrothermal gradient. Notably, no studies have comprehensively assessed nematode  
89 diversity or community composition and their drivers in forest soils across climatic zones using  
90 standardised sampling approaches. Understanding the determinants of biodiversity in forest  
91 soils is however critical to better predict how forest ecosystems will respond to multiple  
92 environmental changes.

93 In the present study, we collected nematodes in forest soils from various climatic zones  
94 (i.e., temperate, warm-temperate, and tropical) to explore soil nematode distribution patterns  
95 and diversity, as well as their drivers, using boosted regression trees models (Elith et al. 2008).  
96 Boosted regression tree (BRT) models draw on insights and techniques from both statistical  
97 and machine learning methods and are a powerful alternative to other models for both  
98 explanation and prediction (Elith et al. 2008). Given that the basal resources of soil organisms  
99 are provided by plant roots, root exudates, and litter (Coleman et al. 2004), and given the slower

100 litter decomposition rates at higher latitudes (Meentemeyer 1978) and faster root turnover rates  
101 at lower latitudes (Gill and Jackson 2000), we hypothesized that the drivers of soil nematode  
102 composition and diversity would vary across climatic zones. For instance, faster root turnover  
103 rates in tropical forest soils may provide more abundant food sources for plant-feeding  
104 nematodes. We also hypothesized that the soil nematode communities in temperate and tropical  
105 forest soils would be particularly sensitive to climatic factors. For instance, global warming  
106 may lead to an increase in nematode diversity at higher latitudes and a decrease in nematode  
107 diversity at lower latitudes because warmer temperatures would be closer to their physiological  
108 optima at higher latitudes and closer to their thermal limits at lower latitudes (Zhao et al. 2021).

109

## 110 **Material and Methods**

111

### 112 *Sampling locations*

113 A regional-scale field investigation was conducted to collect soil nematode samples from seven  
114 nature reserves, including 13 forest sites in China across a latitudinal gradient ranging from  
115 21°36' N to 47°11' N, covering all major zones of forest vegetation in eastern China. From  
116 north to south, the seven nature reserves (and typical vegetation type) are: Liangshui (boreal  
117 forest), Changbaishan (mixed coniferous-broad leaf forest), Donglingshan (deciduous broad-  
118 leaved forest), Jigongshan (deciduous broad-leaved forest), Tiantongshan (evergreen  
119 broadleaved forest), Badagongshan (evergreen/deciduous broad-leaved mixed forest), and  
120 Xishuangbanna (tropical monsoon forest (Fig. 1). Generally, the northern hemisphere  
121 temperate zone refers to the region between the Tropic of Cancer (approximately 23.5° N) to  
122 the Arctic Circle (approximately 66.5° N) and the tropics is the region between the Tropic of  
123 Cancer (approximately 23.5° N) and the Tropic of Capricorn (approximately 23.5° S)  
124 (McColltoll 2005). Therefore, based on the climatic distribution of the nature reserves, we

125 divided the gradient into three climatic zone: the forests in Liangshui (47°11' N) and  
126 Changbaishan (42°22' N) were classified as temperate forests, the forests in Xishuangbanna  
127 (from 21°36' N to 21°57' N) were classified as tropical forests, and the other forests (from  
128 29°46' N to 39°57' N) were classified as warm-temperate forests.

129

### 130 *Soil sampling*

131 In total, we selected 13 forest sites: one site in Donglingshan, Jigongshan, Tiantongshan, and  
132 Badagongshan, two sites in Liangshui and in Changbaishan, and five sites in Xishuangbanna.  
133 This resulted in four sites in temperate forest, four sites in warm-temperate forests, and five  
134 sites in tropical forest. These forest sites were selected from larger areas of forest that are  
135 representatives for the regions. The vegetation types were clearly different between any two  
136 forest sites in the same nature reserve (Appendix S1: Table S4). Three 20 × 20 m sampling  
137 plots, separated by more than 100 m, were randomly established in each forest site, resulting  
138 in a total of 39 sampling plots. Sampling was conducted between August and October 2014,  
139 during the growing season when productivity was highest. Five composite soil samples were  
140 collected from each sampling plot. Specifically, in each plot, five subplots (5 × 5 m) were  
141 established: one in each corner and one in the center. For each subplot, one composite sample  
142 comprised of five soil cores was collected from the upper 0–10 cm of soil. Litter was removed  
143 from the soil surface before soil samples were taken. Visible roots in the soil samples were  
144 picked out by hand. As a result, we collected a total of 195 samples at the subplot level (i.e.,  
145 13 sites × 3 sampling plots × 5 composite soil samples). These samples were subsequently used  
146 for analyses of physicochemical properties and soil nematodes (see below).

147

### 148 *Climate data*

149 For each site, the mean annual precipitation (MAP) and mean annual temperature (MAT) for  
150 the period 1970–2000 were obtained from the WorldClim database  
151 (<http://www.worldclim.org/current>) (Hijmans et al. 2005).

152

### 153 *Plant community and productivity data*

154 For each forest site in the tropical and temperate climatic zones, woody plant community data  
155 were obtained during one or two field surveys from 2004 to 2010; these data were provided by  
156 the nature reserves. Given the greater plant diversity and more diverse forest types in tropical  
157 forests, four 20 × 20 m plant community survey plots were randomly selected for each forest  
158 site in the tropical climatic zone while three 20 × 20 m plant community survey plots were  
159 randomly selected for each forest site in the temperate climatic zone. For the warm-temperate  
160 forests, plant community data were unfortunately unavailable.

161 We defined alpha-diversity of woody plant communities as the species richness of a single  
162 20 × 20 m plot and gamma-diversity as the total richness of those plots at each forest site. Beta-  
163 diversity was defined as the species turnover among the plots at each forest site, and was  
164 measured as  $\text{Beta} = 1 - \alpha_{\text{mean}} / \text{gamma}$  (Whittaker 1960; Kraft et al. 2011). We note that  
165 diversity indices of woody plants for warm-temperate forests could not be calculated due to the  
166 absence of data. The photosynthetic accumulation of carbon by plants per unit time, known as  
167 gross primary productivity (GPP), was estimated from satellite images of the Moderate  
168 Resolution Imaging Spectroradiometer (MODIS) according to an empirical light-use efficiency  
169 (LUE) model with the following equation (Zhang et al. 2012):

170

$$171 \quad GPP = LUE_{\text{max}} \times f(\text{VPD}) \times g(T_{\text{min}}) \times (1 - e^{-k \times \text{LAI}}) \times \text{PAR}$$

172

173 where  $LUE_{\max}$  is the maximum light-use efficiency,  $f(VPD)$  is the scalar of daily vapor  
174 pressure deficit,  $g(T_{\min})$  is the scalar of daily minimum air temperature,  $e$  is the natural constant,  
175  $k$  is the empirical constant in calculating the probability of radiation transmission through the  
176 canopy at zenith angle, PAR is the photosynthetically active radiation absorbed by the canopy,  
177 and LAI is the leaf area index. All of these biome physical parameters are quantified based on  
178 the MODIS land cover classification system using a biome property look-up table. Given that  
179 the long-term accumulation of plant-derived carbon can also influence soil nematodes, we  
180 decided to use the dataset backwards 15 years from the date of soil sampling. Hereto, we  
181 examined the gross primary productivity from 2000–2014 for each site by using the GPP  
182 parameters from the MOD17A2H product. This global GPP product estimates the cumulative  
183 8-day composite of values with a 500 m spatial resolution based on an empirical light-use  
184 efficiency model (Zhao et al. 2005, Zhao et al. 2010, Wang et al. 2017). In addition, to match  
185 the time of soil sampling, we selected the GPP data from August to October of each year from  
186 2000 to 2014.

187

### 188 *Soil analysis*

189 Total soil organic carbon, total soil nitrogen, total soil phosphorus, and soil pH were measured  
190 using standard methods of the Chinese Ecosystem Research Network (Liu 1996). Briefly, soil  
191 water content was measured gravimetrically by drying fresh soil at 105 °C for 48 h. Soil pH  
192 was measured with a 1:2.5 (w/v) ratio of soil to deionized water using a pH meter (Mettler  
193 Toledo, Shanghai, China). Soil organic carbon was oxidized by a solution of 0.133 M  $K_2Cr_2O_7$ –  
194 18.4 M  $H_2SO_4$  in an oil bath and then the excess  $K_2Cr_2O_7$  was titrated with 0.2 M  $FeSO_4$ . Total  
195 soil nitrogen content was measured using an ultraviolet spectrophotometer after Kjeldahl  
196 digestion. Total soil phosphorus content was determined by  $H_2SO_4$ – $HClO_4$  fusion, followed by  
197 the Mo-Sb anti-spectrophotography method.



198 Soil nematodes were extracted from a 30 g subsample of each composite soil sample using  
199 a sugar centrifugation method (Coleman et al. 1999) for determination of nematode abundance,  
200 biomass, and community composition. After fixation in 4% formalin solution, the nematodes  
201 were counted under an inverted microscope, and for each sample the first 100 individuals  
202 encountered were identified to the genus or family level and were classified into trophic groups:  
203 plant-feeders, bacterial feeders, fungal feeders, predators, and omnivores (Yeates et al. 1993).  
204 All nematodes were identified when the total number of nematodes was lower than 100  
205 individuals. In this study, we defined nematode alpha-diversity as the genus or family richness  
206 in a single  $5 \times 5$  m subplot and gamma-diversity as the total richness of the five subplots in  
207 each forest plot. Beta-diversity was defined as the turnover in taxon composition among the  
208 five subplots in each plot, and was measured as  $\text{Beta} = 1 - \alpha_{\text{mean}} / \gamma$  (Whittaker 1960,  
209 Kraft et al. 2011), where  $\alpha_{\text{mean}}$  is the mean alpha diversity of each plot ( $N = 5$ ).

210

### 211 *Statistical analysis*

212 Given the hierarchical structure of our soil sampling protocol, linear mixed effects models  
213 (LMMs) were used to test the effects of climatic zone on soil and nematode properties, using  
214 the R-package lmerTest (Kuznetsova et al. 2017). For models testing the effects of climatic  
215 zone on soil pH, soil organic carbon, total soil nitrogen, total soil phosphorus, nematode alpha-  
216 diversity, total nematode biomass, and abundance and relative abundance of different nematode  
217 trophic groups, we fitted forest site and plot as random effects. For models testing the effects  
218 of climatic zone on nematode beta-diversity, nematode gamma-diversity, and the biomass  
219 proportion of different nematode trophic groups, we fitted forest site as a random effect. Post-  
220 hoc tests were used to compare differences among climatic zones.

221 For all LMMs, restricted maximum likelihood estimates of the parameters were  
222 determined using the lmer function in the lme4 package in R (Bates et al. 2015). For the LMMs,

223 we calculated the marginal and conditional  $R^2$  values, which account for fixed and fixed plus  
224 random effects, respectively. Akaike Information Criteria (AIC) were used to test the random  
225 effects. Specifically, if there was no difference between the AIC value of the model with fixed  
226 plus random effects and the AIC value of the model with only fixed effects, then random effects  
227 were considered to be unimportant. On the other hand, if the difference in AIC value between  
228 the model with fixed plus random effects and the model with only fixed effects is large, then  
229 the random effects cannot be ignored.

230 WorldClim and MODIS does not allow to obtain climate and GPP differences among sub-  
231 plots within a plot and among some plots within a forest site. Therefore, one-way ANOVA was  
232 used to test the effects of climatic zone on MAP, MAT and GPP. Levene's tests were performed  
233 to test for homogeneity of variance.

234 Furthermore, the data on woody plant alpha-diversity were derived from surveys at the  
235 plot level. We therefore calculated gamma-diversity and beta-diversity of woody plants at the  
236 forest site level. Thus, different from our hierarchical data on soil properties (i.e., subplots,  
237 plots, sites and climatic zones), the data on plant diversity are lacking a clear hierarchy. Hence,  
238 independent-samples t-tests were employed to compare differences in alpha-, beta-, and  
239 gamma-diversity of woody plants between the temperate zone and tropical zone. All ANOVAs  
240 and t-tests were performed using SPSS 18.0 software (SPSS Inc., Chicago, IL, USA). Statistical  
241 significance was set at  $p < 0.05$ .

242 In order to determine which variables (soil pH, soil organic carbon, total soil nitrogen, total  
243 soil phosphorus, GPP, alpha-diversity of woody plants, MAP, MAT) were most influential in  
244 driving total nematode biomass, nematode alpha-diversity, total nematode abundance and the  
245 abundance of different trophic groups, the relative importance of each variable was tested using  
246 boosted regression tree (BRT) models (Elith et al. 2008) using the gbm package in R (Ridgeway  
247 2006). Specifically, this method combines regression trees (where models are built according

248 to constrained clustering rules based on how recursive partitioning of a quantitative variable  
249 minimizes the within-group sums of squares under the constraining of a certain explanatory  
250 variable) and boosting algorithm (i.e., a numerical optimization technique for minimizing the  
251 loss function by stage-wisely adding a new tree). To prevent overfitting, the model used a  
252 penalized forward stepwise search and cross-validation method to identify the optimal number  
253 of decision trees (Elith et al. 2008). In BRT models, the settings of tree complexity, learning  
254 rate, bagging fraction and cross-validation folds influence the model fit (De'ath 2007; Elith et  
255 al. 2008). Therefore, multiple model processes that involved training, validation and testing  
256 were fitted with different combinations of parameter settings. Finally, models showing the  
257 smallest cross-validated relative error (CVRE) were selected as optimal models.

258 We ran two sets of models. First, we ran eight models (for total nematode biomass,  
259 nematode alpha-diversity, the abundance of total, plant-feeding, bacterial-feeding, fungal-  
260 feeding, omnivorous, and predatory nematodes) based on data from all individual sub-plots  
261 across all forest sites ( $n = 195$ ). The optimal model settings for each dependent variable were  
262 determined by running 108 BRT processes with the following combinations of settings: tree  
263 complexities of 2, 3, 4 and 5; learning rate of 0.01, 0.005 and 0.001; bag fraction of 0.4, 0.5  
264 and 0.6; 5-, 8- and 10-fold cross-validations. Similarly, we ran eight models (for total nematode  
265 biomass, nematode alpha-diversity, the abundance of total, plant-feeding, bacterial-feeding,  
266 fungal-feeding, omnivorous, and predatory nematodes) based on data from individual sub-plots  
267 in temperate ( $n = 60$ ), warm-temperate ( $n = 60$ ), and tropical ( $n = 75$ ) forest sites. For these  
268 analyses, the optimal model settings for each dependent variable were determined by running  
269 12 BRT processes with the following combinations of settings: tree complexity of 2; learning  
270 rate of 0.01, 0.005, 0.001, and 0.0001; bag fraction of 0.7; 5-, 8- and 10-fold cross-validations.  
271 In all of the above analyses, we used the same climate data for all five subplots within each  
272 sampling plot because WorldClim does not allow to detect climate differences among sub-plots

273 at such a small spatial scale. Similarly, the MODIS GPP data have a spatial resolution of 500  
274 m, while the area of a plot is 400 m<sup>2</sup>. The GPP data were obtained based on the latitude and  
275 longitude of each sampling plot. We then used the same GPP data for all five subplots within  
276 each sampling plot. In the present study, the plots for plant surveys do not exactly match with  
277 the plots for nematode sampling. Thus, for each forest site, we averaged the plant diversity  
278 values at the plot level and then used this value as a proxy of plant diversity at the subplot level.

279 Second, we ran eleven models (for nematode biomass, nematode alpha-, beta-, and  
280 gamma-diversity, mean alpha-diversity of nematodes at plot level, nematode richness index,  
281 and the abundance of total, plant-feeding, bacterial-feeding, fungal-feeding, omnivorous, and  
282 predatory nematodes) based on plot-level data across temperate, warm-temperate, and tropical  
283 zones (n = 39). In total, 36 BRT models for each dependent variable were fitted with the  
284 combinations of the following settings: tree complexities of 2, 3, 4 and 5; learning rate of 0.01,  
285 0.005 and 0.001; bag fraction of 0.75; 5-, 8- and 10-fold cross-validations. The relative  
286 influence of predictor variables on the response variables was estimated based on the number  
287 of times a predictor variable was selected for splitting, weighted by the squared improvement  
288 to the model as a result of each split and averaged over all trees (De'ath 2007, Elith et al. 2008).

289

## 290 **Results**

### 291 *Climate, plant, and soil properties*

292 From tropical to temperate forests, mean annual precipitation (MAP) and mean annual  
293 temperature (MAT) gradually decreased, but soil organic carbon gradually increased (Table 1;  
294 Appendix S1: Tables S1, S2b). Total soil nitrogen, total soil phosphorus and nematode beta-  
295 diversity differed among climatic zones. Specifically, total soil nitrogen and total soil  
296 phosphorus were greater in temperate forests than in warm-temperate and tropical forests,  
297 while there was no difference between warm-temperate and tropical forests (Table 1; Appendix

298 S1: Table S2c, S2d).

299 Nematode beta-diversity was greater in temperate and warm-temperate forests than in  
300 tropical forests, but we did not find differences in nematode beta-diversity between warm-  
301 temperate and temperate forests (Table 1; Appendix S1: Table S2g). Nematode alpha-diversity  
302 was greater in tropical forests than in temperate forests (Table 1; Appendix S1: Table S2e).  
303 Additionally, we did not find significant differences among climatic zones in nematode  
304 gamma-diversity and soil pH (Table 1; Appendix S1: Table S2f, S2a). In general, nematode  
305 biomass was greater in tropical forests than in warm-temperate and temperate forests (Table 1;  
306 Appendix S1: Table S2h). Furthermore, woody plant alpha-diversity, beta-diversity and  
307 gamma-diversity were greater in tropical than in temperate forests (Table 1; Appendix S1:  
308 Table S1).

309

### 310 *Drivers of nematode diversity, abundance, and biomass*

311 At a regional scale, i.e., across tropical, warm-temperate, and temperate forests, soil organic C  
312 was more important in influencing nematode alpha-diversity, beta-diversity, gamma-diversity,  
313 and total abundance than mean annual precipitation (MAP), mean annual temperature (MAT),  
314 or vegetation properties (gross primary productivity and diversity of woody plants) (Figs. 2,  
315 3). Mean annual temperature and total soil phosphorus in temperate forests and MAP in tropical  
316 forests were particularly important in influencing nematode alpha-diversity and trophic groups,  
317 while soil pH was the most important variable in influencing nematode alpha-diversity and  
318 trophic groups in warm-temperate forests. Interestingly, the alpha-diversity of woody plants  
319 had a greater influence on nematode alpha-diversity in tropical forests than in temperate forests.  
320 Additionally, MAP and total soil phosphorus were the most important variables in influencing  
321 nematode biomass in tropical and temperate forests, respectively (Fig. 2). Furthermore, the  
322 highest total abundance of nematodes was found in tropical forests, followed by warm-

323 temperate forests and temperate forests (Fig. 4; Appendix S1: Table S5). Moreover, we found  
324 a greater proportional biomass of plant-feeding nematodes in tropical forests than in warm-  
325 temperate and temperate forests (Fig. 4; Appendix S1: Table S3m). We also found that warm-  
326 temperate forests were dominated by omnivorous nematodes (Fig. 4; Appendix S1: Table S3d,  
327 S3p), and that the biomass proportion and relative abundance of fungal-feeding nematodes was  
328 lower in tropical forests than in warm-temperate and temperate forests (Fig. 4; Appendix S1:  
329 Table S3h, S3n).

330

### 331 **Discussion**

332 In the present study, we found that the drivers of nematode diversity, biomass and abundance  
333 varied across climatic zones, and that nematode diversity, biomass and the abundance of  
334 different nematode trophic groups varied more strongly with climatic factors in temperate and  
335 tropical forests and with soil properties in warm-temperate forests. However, latitudinal  
336 variation in gross primary productivity (GPP) accumulation rate did not reflect variation in  
337 nematode abundance and diversity. Interestingly, plant diversity showed similar latitudinal  
338 patterns as the alpha-diversity of nematodes, but plant diversity did not reflect beta- and  
339 gamma-diversity of nematodes at the regional scale.

340 Studies on nematode diversity that focussed on marine nematode assemblages have shown  
341 that nematode diversity typically decreases with increasing latitude (Lamshead et al. 2002;  
342 Nicholas and Trueman 2005, Lee and Riveros 2012). However, patterns observed in marine  
343 environments are not easy to translate to terrestrial ecosystems. We found that nematode alpha-  
344 diversity was greater in tropical than in temperate forests, but we did not find statistical  
345 differences in nematode alpha-diversity between warm-temperate forests and tropical or  
346 temperate forests. On the contrary, we found that nematode beta-diversity was lower in tropical  
347 than in temperate and warm-temperate forests, but we did not find statistical differences in

348 nematode beta-diversity between warm-temperate forests and temperate forests. Finally, we  
349 did not find significant differences among climatic zones in nematode gamma-diversity.

350 The extreme heterogeneity of soil environments at different spatial and temporal scales  
351 could promote the diversity of soil organisms (Bardgett et al. 2005). For instance, soil  
352 biodiversity at a small scale can be affected by soil compactness (Decaëns 2010), and small-  
353 scale soil spatial heterogeneity has been shown to promote nematode diversity (Nielsen et al.  
354 2010). On the other hand, at a spatial larger scale, soil fertility may largely affect the  
355 composition of soil communities (Laliberté et al. 2017). In the present study, soil organic C  
356 increased from tropical to temperate forests. Furthermore, soil properties may be influenced in  
357 part by the structure and composition of the current vegetation through root and litter input  
358 (Coleman et al. 2004), but at the same time soil formation is a long-term process and the  
359 development of soil properties is partly independent of the current vegetation and may also  
360 reflect past environmental conditions (Wall et al. 2005). This could explain why we found that  
361 soil properties exerted a greater impact on soil nematode abundance and diversity than  
362 aboveground plant GPP and diversity across climatic zones.

363 On the other hand, plant-feeding nematodes are likely to be strongly affected by the current  
364 plant productivity (and biomass) and community composition as they directly feed on plant  
365 roots or root hairs (Ferris and Bongers 2006, Neher 2010). However, in our dataset, plant  
366 productivity did not explain much of the variation in the abundance of plant-feeding  
367 nematodes. We did find however that the GPP and the biomass of nematodes in tropical forests  
368 were greater than those in warm-temperate and temperate forests. Interestingly, the alpha-  
369 diversity of woody plants had a greater influence on nematode alpha-diversity in tropical  
370 forests than in temperate forests. Also, the biomass of plant-feeding nematodes in tropical  
371 forests accounted for more than 90% of the total nematode biomass, and it was greater than the  
372 biomass of plant-feeding nematodes in warm temperate and temperate forests. This indicates

373 that the plant-feeding nematodes and their diversity, relative to other nematode trophic groups,  
374 are more likely to be controlled by the bottom-up effects of plant productivity and plant  
375 diversity (Ferris and Bongers 2006, Neher 2010). Here, plant roots might represent a  
376 particularly important food resource for nematodes because root turnover rates are greater at  
377 low latitudes than at high latitudes (Gill and Jackson 2000). Furthermore, the diversity in root  
378 morphological traits may be greatest at lower latitudes, where plant diversity is highest (Ma et  
379 al. 2018); this may cause greater heterogeneity in soil environments and potentially stimulate  
380 greater nematode diversity in tropical forests.

381 Availability of food and water resources, coupled with a suitable temperature, constitute  
382 the principal factors that control nematode abundance and distribution (Yeates 2004). The  
383 normal temperature at which nematodes are active is roughly between 5 and 30 °C with the  
384 optimal activity temperature being about 20 °C (Wharton 2004). In our study, the variation in  
385 mean monthly temperature ranged from -20 to 20 °C in temperate forests, which is greater than  
386 in warm-temperate forests (-8 to 26 °C) and tropical forests (about 16 to 26 °C) (Appendix S1:  
387 Table S6), and this may be one of the reasons why MAT explained more of the variation in  
388 nematode alpha-diversity and in the abundance of different nematode trophic groups in  
389 temperate forests. Also, at higher latitudes, litter decomposition rate is slower (Meentemeyer  
390 1978) and accumulated litter may create variable microclimatic conditions for soil fauna.  
391 Meanwhile, the greater temperature fluctuations in temperate forests may result in more  
392 variability in resource availability in time and space. As a result, greater litter accumulation  
393 and temperature fluctuations in temperate forests may promote heterogeneity in nematodes  
394 assemblages, which could explain the increase in nematode beta-diversity with increasing  
395 latitude.

396 In addition, the movement, development and survival of nematodes in soil are also  
397 regulated by soil porosity and water potential (Barbercheck and Duncan 2004). For instance,



398 variation in precipitation can alter the composition of soil nematode communities (Franco et  
399 al. 2019), which may result in changes in nematode diversity. Reduced aeration in saturated  
400 soil is often detrimental to nematodes and it has been shown that the developmental rate and  
401 movement of many nematodes is highest when soil water content changes from saturated to  
402 slightly drier states (Barbercheck and Duncan 2004). In our studied system, there is greater  
403 variation in mean monthly precipitation in tropical forests (ranging from 16 to 315 mm) relative  
404 to warm-temperate forests (2 to 231 mm) and temperate forests (3 to 170 mm) (Appendix S1:  
405 Table S7), and this may explain why MAP in tropical forests explains more of the variability  
406 in soil nematode alpha-diversity and in the abundance of different nematode trophic groups  
407 compared to the other forest types.

408

## 409 **Conclusions**

410 Given that nematodes are the most abundant animals on Earth and play key roles in regulating  
411 carbon and nutrient dynamics, and reflecting biological activity in soils (van den Hoogen et al.  
412 2019), understanding the drivers of nematode diversity in forest soils is essential to better  
413 predict how forest ecosystems respond to multiple environmental changes. Based on a large-  
414 scale investigation of soil nematode diversity and the abundance of different nematode trophic  
415 groups and their drivers in forested ecosystems, we conclude that across a hydrothermal  
416 gradient from temperate to tropical climates, nematode abundance and diversity were mainly  
417 influenced by soil organic carbon. Within climatic zones, however, mean annual temperature  
418 and total soil phosphorus in temperate, soil pH in warm temperate, and mean annual  
419 precipitation in tropic were more important drivers. This demonstrates that the drivers of soil  
420 nematode diversity in forested ecosystems are affected by the spatial scale and climatic  
421 conditions considered.

422 In temperate forests the magnitude of variation in temperature may be an important driver

423 of nematode diversity, while in tropical forests the magnitude of variation in precipitation may  
424 be more important. This indicates a latitudinal shift in the main climatic variables controlling  
425 soil nematode communities. Our data further indicated that the alpha- and beta-diversity of  
426 woody plant and nematode alpha-diversity were greater in the tropical forests than in the  
427 temperate forests, while nematode beta-diversity was lower in the tropical forests than in the  
428 temperate forests. This demonstrates a complex and scale-dependent relationship between  
429 plant diversity and soil biodiversity. These findings also have consequences for the scales of  
430 observation of area–diversity relationships (Decaëns 2010). For those forests with greater  
431 nematode beta-diversity, such as temperate forests, increasing the area of sampling may  
432 enhance the probability of detecting rare species. Therefore, for better understanding the  
433 drivers of soil biodiversity distribution, it is crucial to explore the area–diversity relationships  
434 of soil organisms across various ecosystems.

435

#### 436 **Data Availability**

437 All data are presented in the paper.

438

#### 439 **Acknowledgments**

440 We acknowledge all members from the Institute of Geographic Sciences and Natural Resources  
441 Research, Chinese Academy of Sciences, and Peking University for their help with the  
442 fieldwork. This study was sponsored by the Natural Science Foundation of China (31971534,  
443 U1904204, U1804101) and the Innovation Scientists and Technicians Troop Construction  
444 Projects of Henan Province (grant number 182101510005). We are also very grateful for the  
445 support from the nature reserves.

446

#### 447 **Author Contributions**

448 All authors contributed intellectual input and assistance to this study. D.G. and S.F. designed  
449 the study. Y.S. wrote the first draft with help of P.K. Sample collection, and soil chemical and  
450 nematode analysis were carried out by C.M., Z.W., T.L., and Y.S. Climate and plant data were  
451 collected by Y.H., C.M. and Y.S. Statistical analyses were carried out by Y.S., Y.C. and Z.W.  
452 Assistance in data interpretation was provided by Y.S., P.K., Y.H., Y.C., C.Z. and W.Z.

453

#### 454 **Competing Interest Statement**

455 The authors declare no competing interests.

456

#### 457 **References**

- 458 Barbercheck, M. E., and L. Duncan. 2004. Abiotic Factors. Pages 309–343 *in* Gaugler R., and  
459 A. L. Bilgrami, editors. Nematode Behaviour. CABI Publishing, Wallingford, Oxfordshire.  
460 UK.
- 461 Bardgett, R. D. and W. H. van der Putten 2014. Belowground biodiversity and ecosystem  
462 functioning. *Nature* 515: 505–511.
- 463 Bardgett, R. D., and D. A. Wardle. 2010. Aboveground-Belowground Linkages: Biotic  
464 Interactions, Ecosystem Processes, and Global Change. Oxford University Press. Oxford.  
465 UK.
- 466 Bardgett, R. D., G. W. Yeates, and J. M. Anderson. 2005. Patterns and determinants of soil  
467 biological diversity. Pages 100–118 *in* R. D. Bardgett, M. B. Usher, and D. W. Hopkins,  
468 editors. *Biological Diversity and Function in Soils*. Cambridge University Press, Cambridge.  
469 UK.
- 470 Bates, D., M. Mächler, B. Bolker, and S. Walker. 2015. “Fitting Linear Mixed-Effects Models  
471 Using lme4.” *Journal of Statistical Software* 67: 1–48. doi: 10.18637/jss.v067.i01.
- 472 Bongers, T. and H. Ferris. 1999. Nematode community structure as a bioindicator in

- 473 environmental monitoring. *Trends in Ecology & Evolution* 14: 224–228.
- 474 Chen, D., J. Cheng, P. Chu, J. Mi, and Y. Bai. 2016. Effect of diversity on biomass across  
475 grasslands on the mongolian plateau: contrasting effects between plants and soil nematodes.  
476 *Journal of Biogeography* 43: 955–966.
- 477 Chen, D., J. Cheng, P. Chu, S. Hu, Y. Xie, I. Tuvshintogtokh, and Y. Bai. 2015. Regional-scale  
478 patterns of soil microbes and nematodes across grasslands on the Mongolian plateau:  
479 relationships with climate, soil, and plants. *Ecography* 38: 622–631.
- 480 Coleman, D.C., J. M. Blair, E. T. Elliott, and D. H. Wall. 1999. Soil invertebrates. Pages 349–  
481 377 in G. P. Robertson, D. C. Coleman, C. S. Bedsoe, and P. Sollins, editors. *Standard Soil*  
482 *Methods for Long-term Ecological Research*. Oxford University Press. New York. USA.
- 483 Coleman, D.C., D. A. Crossley Jr., and P. F. Hendrix. 2004. *Fundamentals of Soil Ecology*.  
484 Second edition. Elsevier Academic Press, Burlington, San Diego, London.
- 485 De'ath, G. 2007. Boosted trees for ecological modeling and prediction, *Ecology* 88, 243–251.
- 486 Decaëns, T. 2010. Macroecological patterns in soil communities. *Global Ecology and*  
487 *Biogeography* 19: 287–302.
- 488 Elith, J., J. R. Leathwick, and T. Hastie. 2008. A working guide to boosted regression trees.  
489 *Journal of Animal Ecology* 77: 802–813.
- 490 Ferris, H., and T. Bongers. 2006. Nematode indicators of organic enrichment. *Journal of*  
491 *Nematology* 38: 3–12.
- 492 Franco, A.L.C., L. A. Gherardi, C. M. D. Tomasel, W. S. Andriuzzi, and D. H. Wall. 2019.  
493 Drought suppresses soil predators and promotes root herbivores in mesic, but not in xeric  
494 grasslands. *Proceedings of the National Academy of Sciences USA* 116: 12883–12888. doi:  
495 10.1073/pnas.1900572116.
- 496 Gill, R. A., and R. B. Jackson. 2000. Global patterns of root turnover for terrestrial ecosystems.  
497 *New Phytologist* 147: 13–31.

- 498 Hawkins, B.A. et al. 2003. Energy, water, and broad-scale geographic patterns of species  
499 richness. *Ecology* 84: 3105–3117.
- 500 Hijmans, R. J., S. E. Cameron, J. L. Parra, P. G. Jones, and A. Jarvis. 2005. Very high resolution  
501 interpolated climate surfaces for global land areas. *International Journal of Climatology* 25:  
502 1965–1978.
- 503 Hugot, J. P., P. Baujard, and S. Morand. 2001. Biodiversity in helminths and nematodes as a  
504 field of study: an overview. *Nematology* 3: 199–208.
- 505 Kraft, N. J. et al. 2011. Disentangling the drivers of  $\beta$  diversity along latitudinal and elevational  
506 gradients. *Science* 333: 1755–1758.
- 507 Kuznetsova, A., P. B. Brockhoff, and R. H. B. Christensen. 2017. “lmerTest Package: Tests in  
508 Linear Mixed Effects Models.” *Journal of Statistical Software* 82: 1–26. doi:  
509 10.18637/jss.v082.i13.
- 510 Laliberté, E., P. Kardol., R. K. Didham, F. P. Teste, B. L. Turner, and D. A. Wardle. 2017. Soil  
511 fertility shapes belowground food webs across a regional climate gradient. *Ecology Letters*  
512 20: 1273–1284.
- 513 Lamshead, P., C. J. Brown, T. J. Ferrero, N. J. Mitchell, C. R. Smith, L. E. Hawkins, and J.  
514 Tietjen. 2002. Latitudinal diversity patterns of deep-sea marine nematodes and organic  
515 fluxes: A test from the central equatorial Pacific. *Marine Ecology Progress Series* 236: 129–  
516 135.
- 517 Lee, M. R., and M. Riveros. 2012. Latitudinal trends in the species richness of free-living  
518 marine nematode assemblages from exposed sandy beaches along the coast of Chile (18–  
519 42°S). *Marine Ecology* 33: 317–325.
- 520 Liu, G. 1996. *Soil Physical and Chemical Analysis & Description of Soil Profiles*. China  
521 Standard, Beijing, China (in Chinese).
- 522 Ma, Z.Q. et al. 2018. Evolutionary history resolves global organization of root functional traits.

- 523 Nature 555: 94-97.
- 524 McColltoll, R. W. 2005. Encyclopedia of World Geography, Volume 1. Facts on File Library  
525 of World Geography. Facts on File, New York, USA.
- 526 Meentemeyer, V. 1978. Macroclimate and lignin control of litter decomposition rates. Ecology  
527 59, 465–472.
- 528 Neher, D. A. 2010. Ecology of plant and free-living nematodes in natural and agricultural soil.  
529 Annual Review of Phytopathology 48: 371–394.
- 530 Nicholas, W. L., and J. Trueman. 2005. Biodiversity of marine nematodes in Australian sandy  
531 beaches from tropical and temperate regions. Biodiversity and Conservation 14: 823–839.
- 532 Nielsen, U.N., E. Ayres, D. H. Wall, G. Li, R. D. Bardgett, T. Wu, and J. R. Garey. 2014. Global-  
533 scale patterns of assemblage structure of soil nematodes in relation to climate and ecosystem  
534 properties. Global Ecology and Biogeography 23: 968–978.
- 535 Nielsen, U.N., G. H. R. Osler, C. D. Campbell, R. Neilson, D. F. R. P. Burslem, and R. van  
536 der Wal. 2010. The enigma of soil animal species diversity revisited: The role of small-scale  
537 heterogeneity. PLoS One 5: e11567.
- 538 Phillips, H.R.P. et al. 2019. Global distribution of earthworm diversity. Science 366: 480–485.
- 539 Ridgeway, G. 2006. Generalized boosted regression models. Documentation on the R Package  
540 ‘gbm’, version 1.5–7.
- 541 van den Hoogen, J. et al. 2019. Soil nematode abundance and functional group composition at  
542 a global scale. Nature 572: 194–198.
- 543 Wagg, C., S. F. Bender, F. Widmer, and M. G. A. van der Heijden. 2014. Soil biodiversity and  
544 soil community composition determine ecosystem multifunctionality. Proceedings of the  
545 National Academy of Sciences USA 111: 5266–5270.
- 546 Wall, D. H., A. H. Fitter, and E. A. Paul. 2005. Developing new perspectives from advances in  
547 soil biodiversity research. Pages 3–27 in R. D. Bardgett, M. B. Usher, and D.W. Hopkins,

- 548 editors. *Biological Diversity and Function in Soils*. Cambridge University Press, Cambridge,  
549 UK.
- 550 Wall, D.H., U.N. Nielsen, and J. Six. 2015. Soil biodiversity and human health. *Nature* 528:  
551 69–76.
- 552 Wang, L, H. Zhu, A. Lin, L. Zou, W. Qin, and Q. Du. 2017. Evaluation of the latest MODIS  
553 GPP products across multiple biomes using global eddy covariance flux data. *Remote*  
554 *Sensing* 9: 418; doi:10.3390/rs9050418.
- 555 Wardle, D. A., R. D. Bardgett, J. N. Klironomos, H. Setälä, W. H. van der Putten, and D. H.  
556 Wall. 2004. Ecological linkages between aboveground and belowground biota. *Science* 304:  
557 1629–1633.
- 558 Wharton, D.A. 2004. Survival Strategies. Pages 371–399 *in* R. Gaugler, and A. L. Bilgrami,  
559 editors. *Nematode Behaviour*. CABI Publishing, Wallingford, Oxfordshire. UK.
- 560 Whittaker, R.H. 1960. Vegetation of the Siskiyou Mountains, Oregon and California.  
561 *Ecological Monographs* 30: 279–338.
- 562 Wu, J., H. Chen, and Y. Zhang 2016. Latitudinal variation in nematode diversity and ecological  
563 roles along the Chinese coast. *Ecology and Evolution* 6: 8018–8027.
- 564 Xiao, H., W. Wang, S. Xia, Z. Li, J. Gan, and X. Yang. 2021. Distributional patterns of soil  
565 nematodes in relation to environmental variables in forest ecosystems. *Soil Ecology Letters*  
566 3: 115–124.
- 567 Xiong, D. et al. 2020. Nonlinear responses of soil nematode community composition to  
568 increasing aridity. *Global Ecology and Biogeography* 29: 117–126.
- 569 Yeates, G.W. 2004. Ecological and Behavioural Adaptations. Pages 1–24 *in* R. Gaugler, and A.  
570 L. Bilgrami, editors. *Nematode Behaviour*. CABI Publishing, Wallingford, Oxfordshire. UK.
- 571 Yeates, G.W., T. Bongers, R. G. M. De Goede, D. W. Freckman, and S. S. Georgieva. 1993.  
572 Feeding habits in soil nematode families and genera—an outline for soil ecologists. *Journal*

- 573 of Nematology 25: 315–331.
- 574 Zhang, F, J. M. Chen, J. Chen, C. M. Gough, T. A. Martin, and D. Dragoni. 2012. Evaluating  
575 spatial and temporal patterns of MODIS GPP over the conterminous U.S. against flux  
576 measurements and a process model. *Remote Sensing of Environment* 124: 717–729.
- 577 Zhao, M, F. A. Heinsch, R. R. Nemani, and S.W. Running. 2005. Improvements of the MODIS  
578 terrestrial gross and net primary production global data set. *Remote Sensing of Environment*  
579 95: 164–176.
- 580 Zhao, M, and S.W. Running. 2010. Drought-induced reduction in global terrestrial net primary  
581 production from 2000 through 2009. *Science* 329: 940–943.
- 582 Zhao, L. et al. 2021. The effects of plant resource inputs on the energy flux of soil nematodes  
583 are affected by climate and plant resource type. *Soil Ecology Letters* 3: 134–144.



584 Table 1. Climate, soil, plant and nematode properties for tropical, warm-temperate and temperate forest sites. Values are means  $\pm$ SE for nematode  
585 beta- and gamma-diversity, and woody plant beta- and gamma diversity (n = 4 in temperate forests (4 sites), and n = 5 in tropical forests (5 sites));  
586 for woody plant alpha-diversity (n = 12 in temperate forests (4 sites  $\times$  3 plots), and n = 20 in tropical forests (5 sites  $\times$  4 plots)); for climatic  
587 properties, soil physio-chemical properties, GPP, nematode alpha-diversity and nematode biomass (n = 12 in temperate and warm-temperate forests  
588 (4 sites  $\times$  3 plots), and n = 15 in tropical forests (5 sites  $\times$  3 plots). Different letters in a row indicate significant differences among tropical, warm-  
589 temperate, and temperate forests (post-hoc tests after one-way ANOVA for MAP, MAT and GPP, independent-samples t-test for alpha-, beta- and  
590 gamma-diversity of woody plants, and post-hoc test after linear mixed effects models for soil and nematode properties,  $P < 0.05$ ). MAP, mean  
591 annual precipitation; MAT, mean annual temperature; \*, diversity indices for warm-temperate could not be calculated due to the absence of plant  
592 data.

|          |                                      | Tropical |                    | Warm-temperate |                    | Temperate |                   |
|----------|--------------------------------------|----------|--------------------|----------------|--------------------|-----------|-------------------|
| Climate  | MAP (mm)                             | 1645.9 ± | 8.2 <sup>a</sup>   | 1116.3 ±       | 115.1 <sup>b</sup> | 661.7 ±   | 9.9 <sup>c</sup>  |
|          | MAT ( °C)                            | 21.9 ±   | 0.1 <sup>a</sup>   | 12.1 ±         | 1.1 <sup>b</sup>   | 2.2 ±     | 0.2 <sup>c</sup>  |
| Soil     | pH                                   | 5.3 ±    | 0.3 <sup>a</sup>   | 5.1 ±          | 0.3 <sup>a</sup>   | 5.7 ±     | 0.1 <sup>a</sup>  |
|          | Soil organic C (mg g <sup>-1</sup> ) | 28.1 ±   | 2.2 <sup>c</sup>   | 71.8 ±         | 11.3 <sup>b</sup>  | 150.0 ±   | 12.2 <sup>a</sup> |
|          | Total soil N (mg g <sup>-1</sup> )   | 2.0 ±    | 0.3 <sup>b</sup>   | 3.77 ±         | 0.49 <sup>b</sup>  | 8.71 ±    | 1.01 <sup>a</sup> |
|          | Total soil P (mg g <sup>-1</sup> )   | 0.3 ±    | 0.0 <sup>b</sup>   | 0.44 ±         | 0.08 <sup>b</sup>  | 0.92 ±    | 0.09 <sup>a</sup> |
| Plant    | Alpha-diversity                      | 44.6 ±   | 4.9 <sup>a</sup>   |                | *                  | 13.3 ±    | 1.3 <sup>b</sup>  |
|          | Gamma-diversity                      | 106.2 ±  | 22.7 <sup>a</sup>  |                | *                  | 19.0 ±    | 2.3 <sup>b</sup>  |
|          | Beta-diversity                       | 0.58 ±   | 0.01 <sup>a</sup>  |                | *                  | 0.31 ±    | 0.03 <sup>b</sup> |
|          | GPP                                  | 229.4 ±  | 0.3 <sup>a</sup>   | 137.1 ±        | 6.4 <sup>b</sup>   | 126.3 ±   | 2.5 <sup>b</sup>  |
| Nematode | Alpha-diversity                      | 42.8 ±   | 1.2 <sup>a</sup>   | 38.8 ±         | 3.6 <sup>ab</sup>  | 37.3 ±    | 3.3 <sup>b</sup>  |
|          | Gamma-diversity                      | 59.0 ±   | 2.4 <sup>a</sup>   | 55.8 ±         | 5.2 <sup>a</sup>   | 61.0 ±    | 5.5 <sup>a</sup>  |
|          | Beta-diversity                       | 0.27 ±   | 0.02 <sup>b</sup>  | 0.31 ±         | 0.04 <sup>a</sup>  | 0.39 ±    | 0.04 <sup>a</sup> |
|          | Biomass                              | 3737.2 ± | 592.5 <sup>a</sup> | 490.5 ±        | 108.8 <sup>b</sup> | 250.2 ±   | 50.4 <sup>b</sup> |

594

## Figure Legends

595

596 Fig. 1. The forest sampling sites across different climatic zones in China. Dots refer to the  
597 sampling sites for field investigation, which spanned across tropical forests (Xishuangbanna,  
598 XSBN), warm-temperate forests (Donglingshan, DLS; Jigongshan, JGS; Tiantongshan, TTS;  
599 Badagongshan, BDGS), and temperate forests (Liangshui, LS; Changbaishan CBS).

600

601 Fig. 2. The relative importance of the seven or eight variables from the eight models based on  
602 subplot-level data at the regional scale ( $n = 195$ ) (A) and separately for tropical ( $n = 75$ ), warm-  
603 temperate ( $n = 60$ ), and temperate ( $n=60$ ) forests (B-D) in explaining soil nematode variables.  
604 Rows show the results of each model (from top to bottom, nematode biomass (Biomass),  
605 nematode alpha-diversity (Alpha), the total abundance of nematodes (Total), and the  
606 abundance of plant-feeding (Pl), omnivorous (Om), predatory (Pr), fungal-feeding (Fu), and  
607 bacterial-feeding (Ba) nematodes). Columns represent the variables that are present in the  
608 model. Within each row, the size of the circles is proportional to the relative importance of the  
609 variables. Palpha refers to the alpha-diversity of woody plants.

610

611 Fig. 3. The importance of the eight variables from the eleven models based on plot-level data  
612 across temperate, warm-temperate, and tropical forest sites ( $n = 39$ ) in explaining soil nematode  
613 variables. Rows show the results of each model (from top to bottom, nematode biomass  
614 (Biomass), nematode gamma-diversity (Gamma), nematode beta-diversity (Beta), nematode  
615 alpha-diversity (Alpha.mean), nematode taxon richness (Richness), the total abundance of  
616 nematodes (Total), and the abundance of plant-feeding (Pl), omnivorous (Om), predatory (Pr),  
617 fungal-feeding (Fu), and bacterial-feeding (Ba) nematodes). Columns represent the variables

618 that are present in the model. Within each row, the size of the circles is proportional to the  
619 relative importance of the variables. Palpha refers to the alpha-diversity of woody plants.

620

621 Fig. 4. The abundance (a), relative abundance (b), and biomass proportion (c) of plant-  
622 feeding (Pl), fungal-feeding (Fu), bacterial-feeding (Ba), omnivorous (Om), unknown and  
623 predatory (Pr) nematodes for tropical, warm-temperate, and temperate forests. Notably,  
624 ‘unknown’ nematodes referred to unidentified nematodes and were not included in panel c  
625 because nematode biomass was estimated based on the identified nematodes, and biomass of  
626 unknown nematodes could not be estimated accurately. Data are means  $\pm$  SE ( $n = 12$  for  
627 temperate and warm- temperate forest plots,  $n = 15$  for tropical forest plots). Within each  
628 panel, different lowercase letters denote significant ( $P < 0.05$ ) differences among climatic  
629 zones based on post-hoc tests after linear mixed effects models.

630

631

632

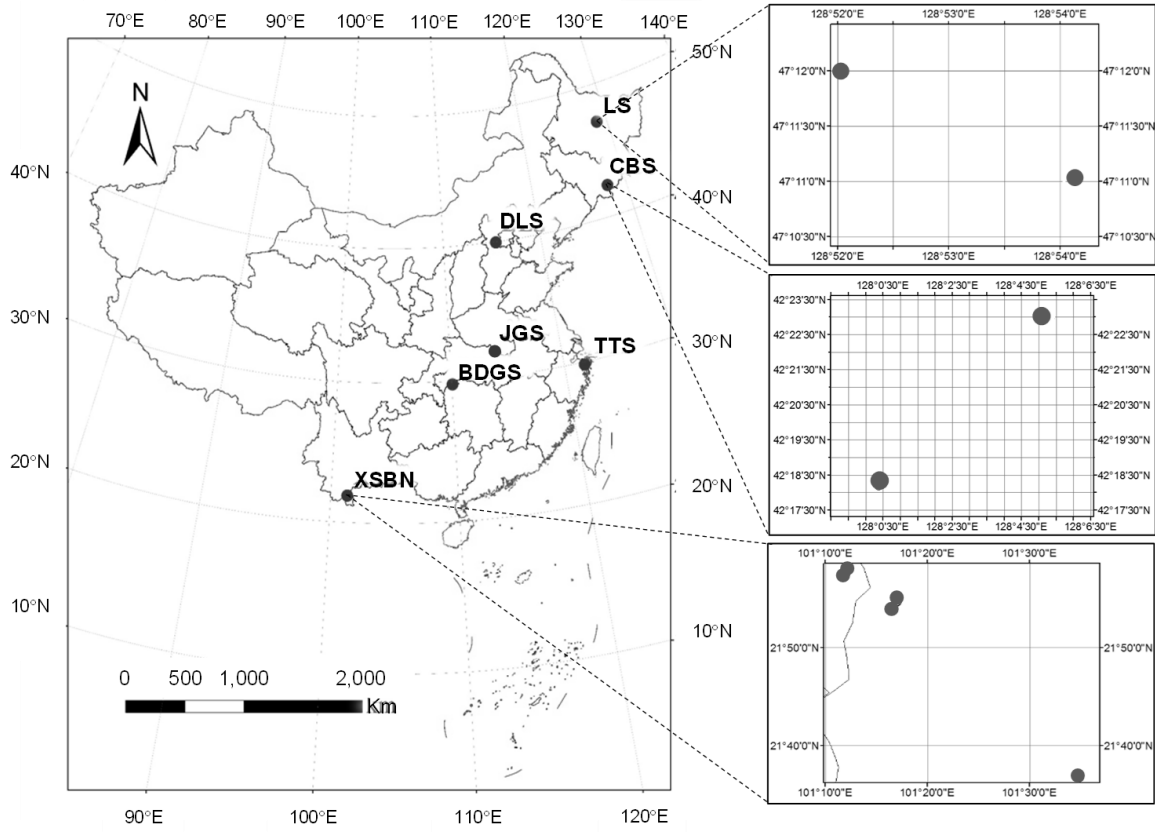

633

634 Fig. 1

635

636

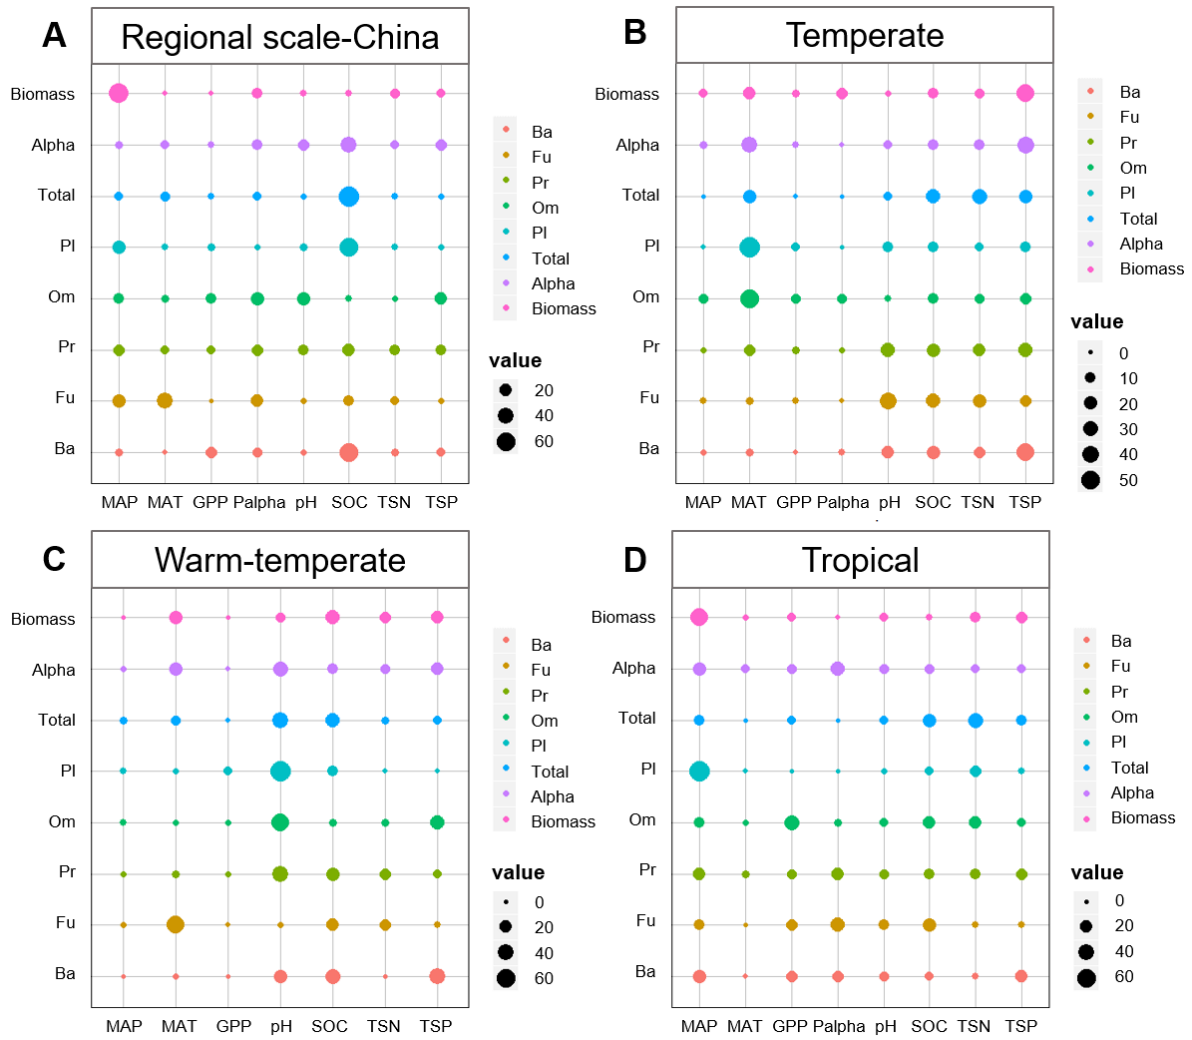

637

638 Fig. 2

639

640

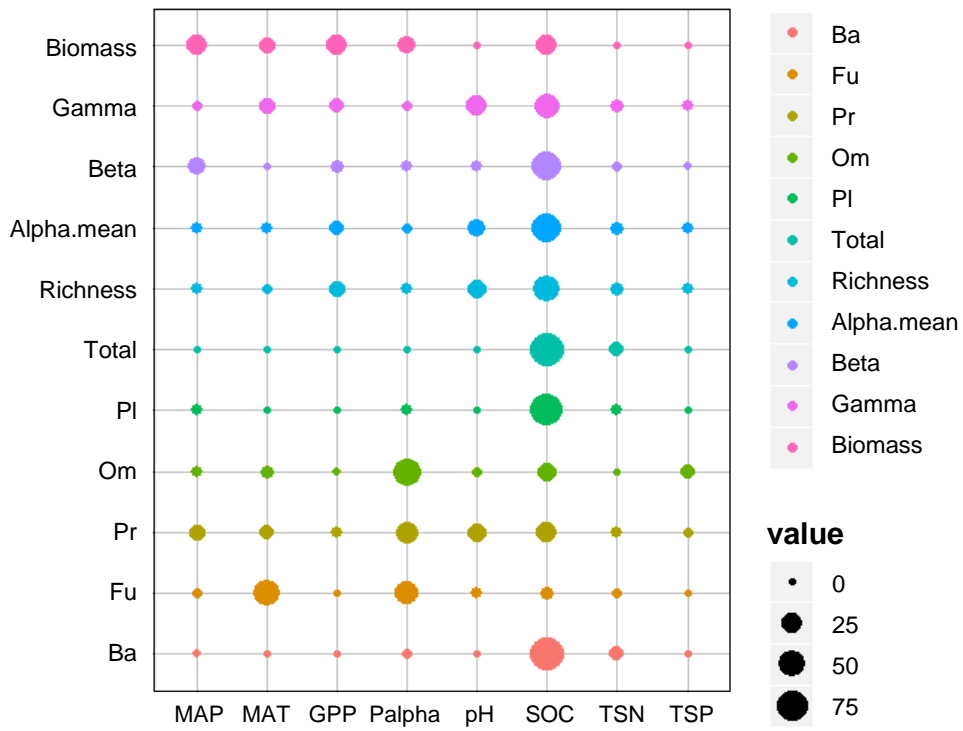

641

642 Fig. 3

643

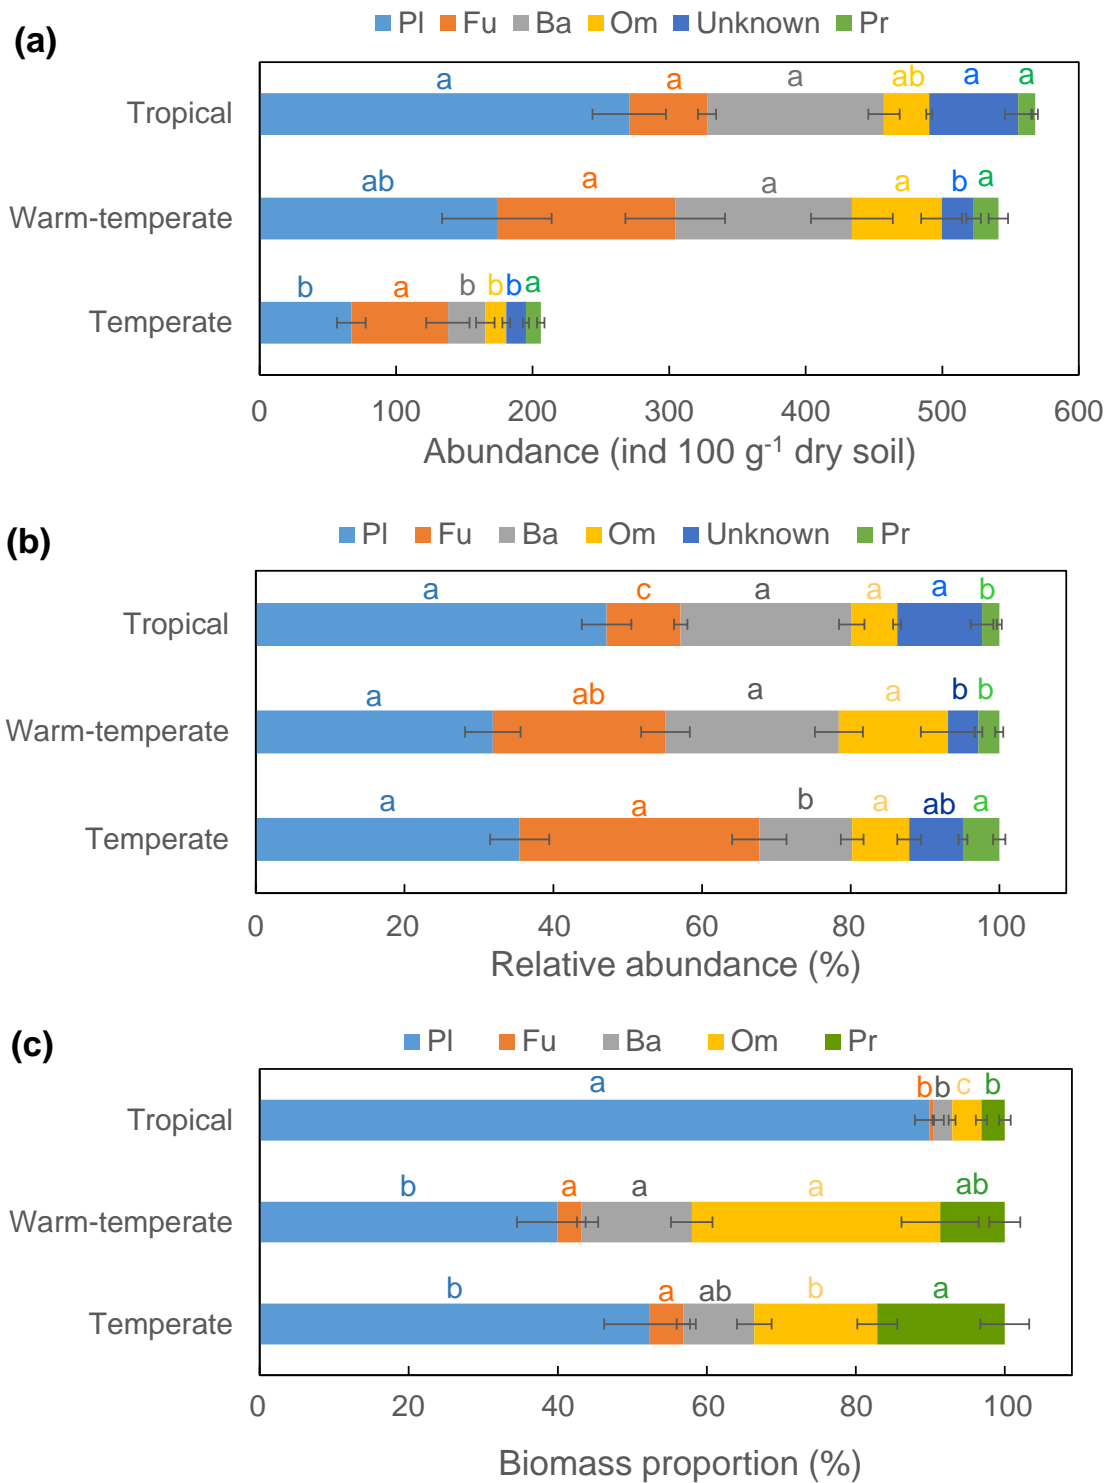

644

645 Fig. 4
